# Supplementary material
Source: publisher figshare collection journal article supplement (https://acs.figshare.com/ndownloader/files/3819262)

# SUPPORTING INFORMATION

## **Macrocyclic Cell Penetrating Peptides: A Study of Structure-Penetration Properties.**

Hassan Traboulsi, Heidi Larkin, Marc-André Bonin, Leonid Volkov, Christine Lavoie and Eric Marsault.

Institut de pharmacologie de Sherbrooke, Department of Pharmacology, Faculty of Medicine and Health Science, Université de Sherbrooke, Sherbrooke, Qc, Canada.

|                                                                        |           |
|------------------------------------------------------------------------|-----------|
| <b>A. Synthesis of Bicyclic Peptides</b>                               | <b>S2</b> |
| <b>B. Supplementary Flow Cytometry and Confocal Microscopy Figures</b> | <b>S3</b> |
| <b>C. Circular Dichroism results</b>                                   | <b>S4</b> |
| <b>D. Table of Characterization</b>                                    | <b>S5</b> |
| <b>E. UPLC and MS Results</b>                                          | <b>S6</b> |

## A. Synthesis of Bicyclic Peptides

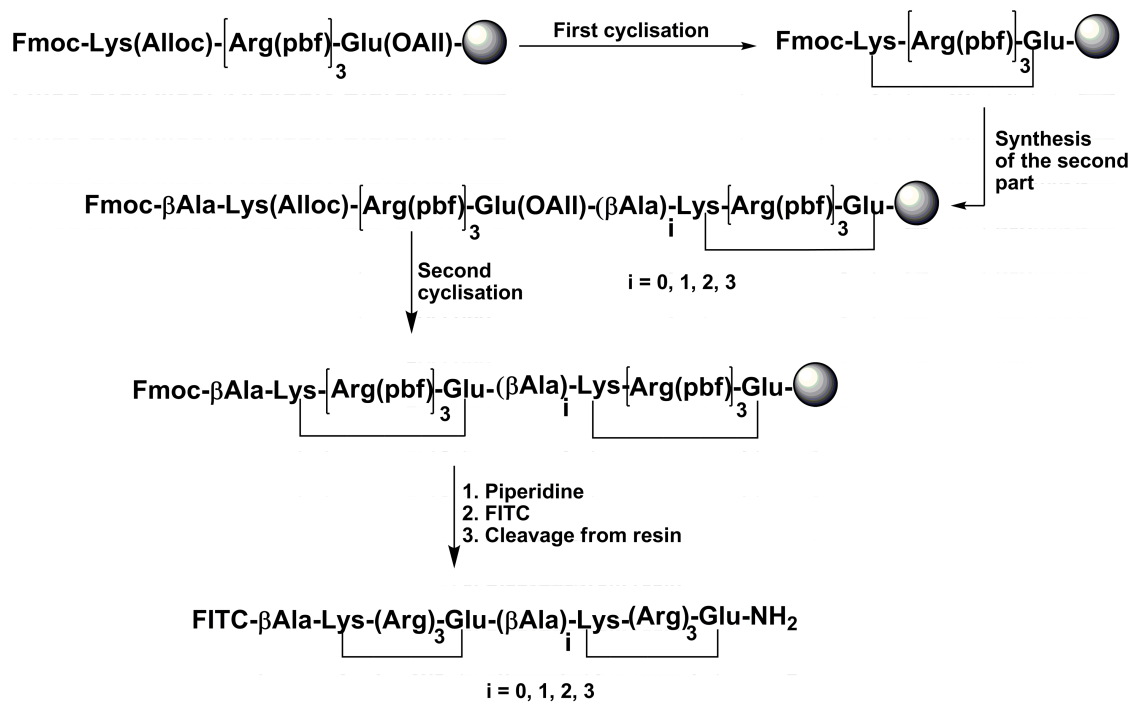

**Figure S1:** Synthetic scheme for preparing bicyclic polyarginine analogues.

## B. Supplementary Flow Cytometry and Confocal Microscopy Figures

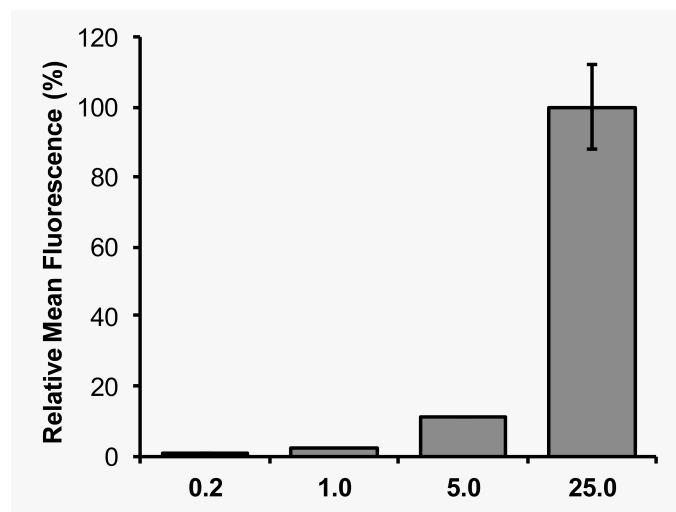

**Figure S2:** Concentration-dependent response for the uptake of Cyc-R<sub>9</sub> macrocycle (concentrations indicated in μM).

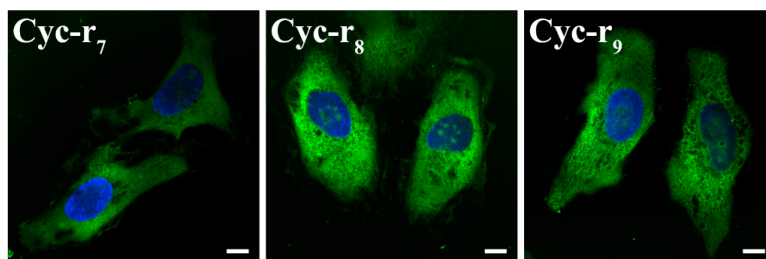

**Figure S3:** Confocal microscopy images of HeLa cells treated with macrocyclic homochiral (D)-peptides (in green). Nuclei are marked in blue. Scale bar, 10 μm.

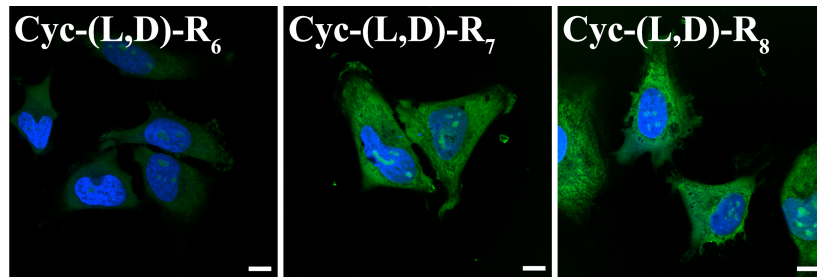

**Figure S4:** Confocal microscopy images of HeLa cells treated with (L,D)-peptides (in green). Nuclei are marked in blue. Scale bar, 10  $\mu$ m.

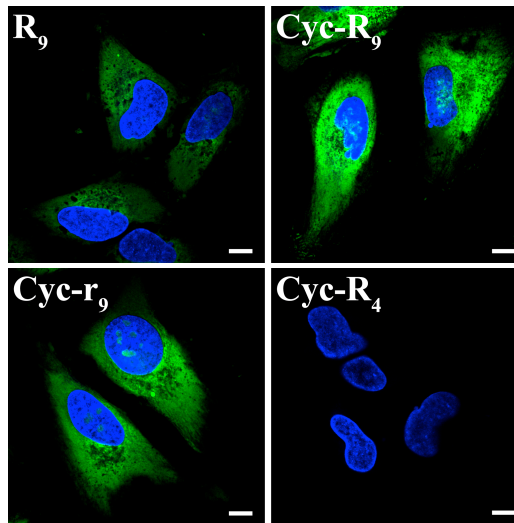

**Figure S5:** Live confocal microscopy images of HeLa cells incubated with FITC-labeled linear and cyclic peptides. Nuclei are marked in blue. Scale bar, 10  $\mu$ m.



## C. Circular Dichroism Results

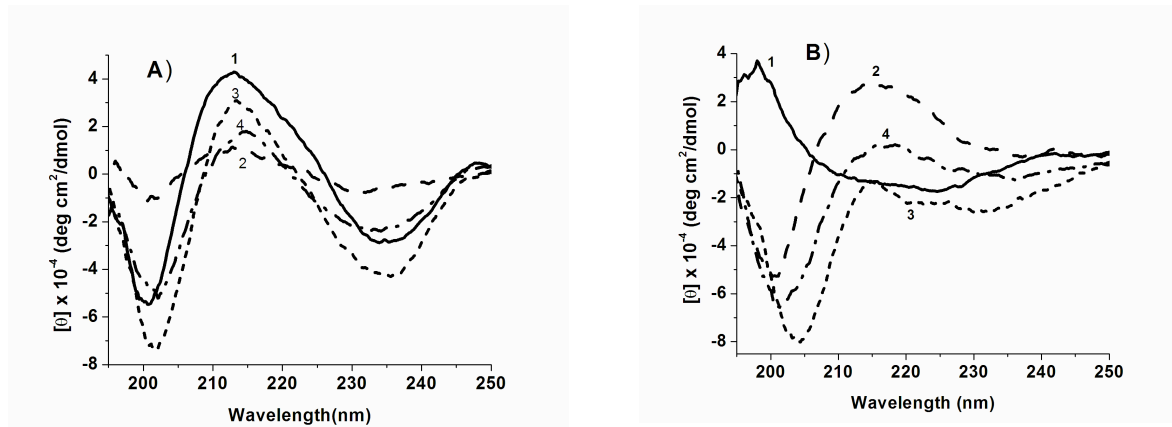

**Figure S6:** Circular dichroism spectra of **A)** linear and monocyclic peptides (1) R<sub>6</sub> ; (2) Cyc-R<sub>6</sub> ; (3) R<sub>7</sub> ; (4) Cyc-R<sub>7</sub> and **B)** bicyclic peptides where (1) Bicyc-0-R<sub>6</sub> ; (2) Bicyc-1-R<sub>6</sub> ; (3) Bicyc-2-R<sub>6</sub> ; (4) Bicyc-3-R<sub>6</sub>.

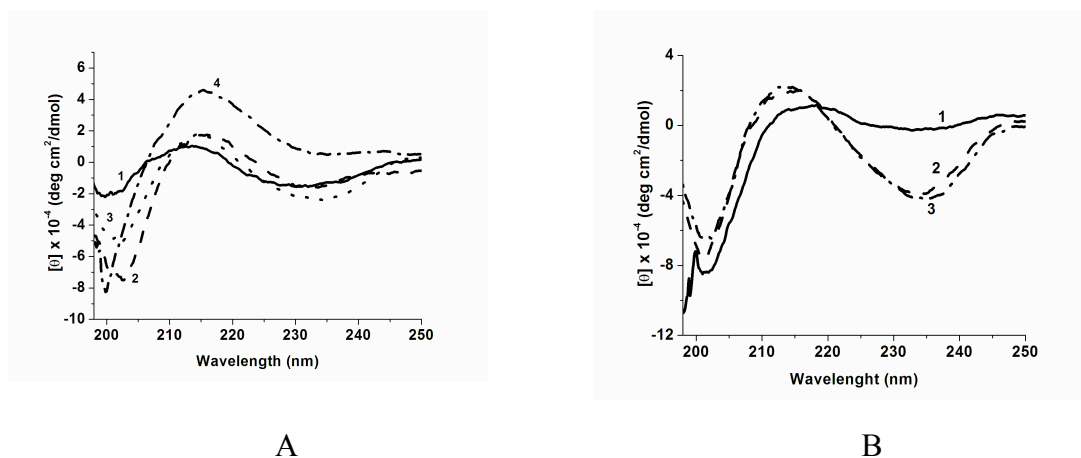

**Figure S7 :** CD spectra in water of **A)** (1) Cyc-R<sub>4</sub> ; (2) R<sub>9</sub> ; (3) Cyc-R<sub>8</sub> ; (4) Cyc-(L-D)-R<sub>8</sub> and **B)** (1) Cyc-(L-D)-R<sub>7</sub> ; (2) Cyc-R<sub>3</sub>-R<sub>4</sub> and (3) Cyc-R<sub>4</sub>-R<sub>3</sub>

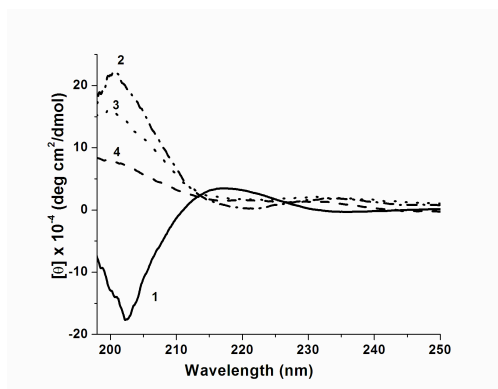

**Figure S8 :** CD spectra in water of (1) Cyc-R<sub>9</sub> ; (2) Cyc-r<sub>9</sub> ; (3) Cyc-r<sub>8</sub> ; (4) Cyc-r<sub>7</sub>

### D. Table of Characterization

**Table S1:** molecular weight, purity and UPLC retention time of new compounds

| Compound                           | Calculated mass  | Observed mass    | Purity<br>(UPLC-UV) | Retention time<br>(UPLC) |
|------------------------------------|------------------|------------------|---------------------|--------------------------|
| Cyc-R <sub>6</sub>                 | (M+2)/2 = 827.95 | (M+2)/2 = 828.20 | 97%                 | 0.85                     |
| Cyc-R <sub>7</sub>                 | (M+2)/2 = 906.04 | (M+2)/2 = 906.31 | 92%                 | 0.82                     |
| Cyc-R <sub>8</sub>                 | (M+3)/3 = 656.42 | (M+3)/3 = 656.82 | 96%                 | 0.81                     |
| Cyc-R <sub>9</sub>                 | (M+3)/3 = 708.48 | (M+3)/3 = 709.09 | 98%                 | 0.84                     |
| Cyc-(L-D)-R <sub>6</sub>           | (M+2)/2 = 827.95 | (M+2)/2 = 828.42 | 93%                 | 0.83                     |
| Cyc-(L-D)-R <sub>7</sub>           | (M+2)/2 = 906.04 | (M+2)/2 = 906.29 | 94%                 | 0.81                     |
| Cyc-(L-D)-R <sub>8</sub>           | (M+3)/3 = 656.42 | (M+3)/3 = 656.89 | 92%                 | 0.82                     |
| Cyc-r <sub>7</sub>                 | (M+3)/3 = 604.35 | (M+3)/3 = 604.99 | 99%                 | 0.83                     |
| Cyc-r <sub>8</sub>                 | (M+3)/3 = 656.42 | (M+3)/3 = 657.04 | 99%                 | 0.83                     |
| Cyc-r <sub>9</sub>                 | (M+3)/3 = 708.43 | (M+3)/3 = 709.09 | 100%                | 0.84                     |
| Bicyc-0-R <sub>6</sub>             | (M+3)/3 = 632.06 | (M+3)/3 = 632.59 | 98%                 | 0.85                     |
| Bicyc-1-R <sub>6</sub>             | (M+3)/3 = 655.75 | (M+3)/3 = 656.29 | 94%                 | 0.85                     |
| Bicyc-2-R <sub>6</sub>             | (M+3)/3 = 679.44 | (M+3)/3 = 679.92 | 97%                 | 0.86                     |
| Bicyc-3-R <sub>6</sub>             | (M+3)/3 = 703.14 | (M+3)/3 = 703.62 | 95%                 | 0.86                     |
| Cyc-R <sub>3</sub> -R <sub>4</sub> | (M+2)/2 = 906.04 | (M+2)/2 = 906.38 | 94%                 | 0.82                     |
| Cyc-R <sub>4</sub> -R <sub>3</sub> | (M+2)/2 = 906.04 | (M+2)/2 = 906.45 | 94%                 | 0.83                     |
| Cyc-R <sub>5</sub> -R <sub>2</sub> | (M+2)/2 = 906.04 | (M+2)/2 = 905.98 | 94%                 | 0.82                     |
| Cyc-R <sub>6</sub> -R <sub>1</sub> | (M+2)/2 = 906.04 | (M+2)/2 = 906.07 | 95%                 | 0.83                     |

## D. UPLC and MS results

- R<sub>6</sub>

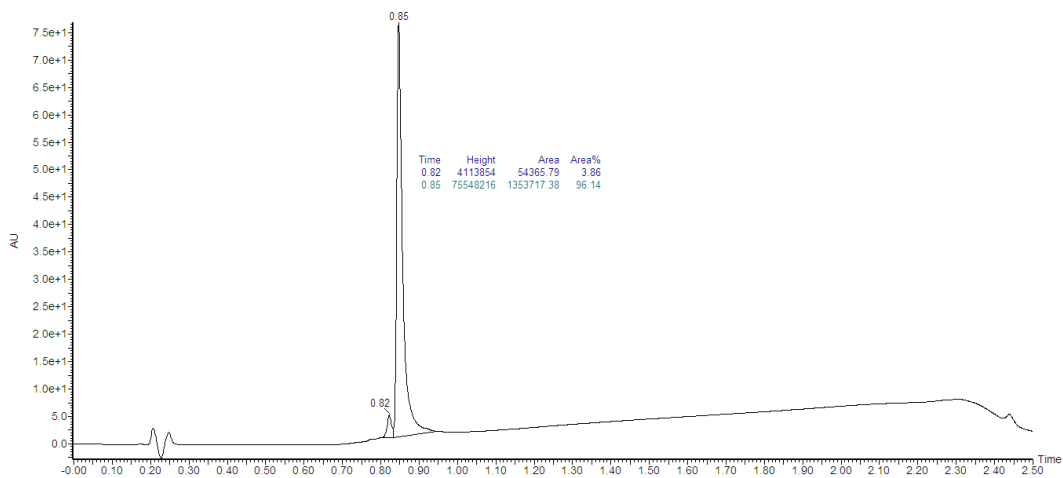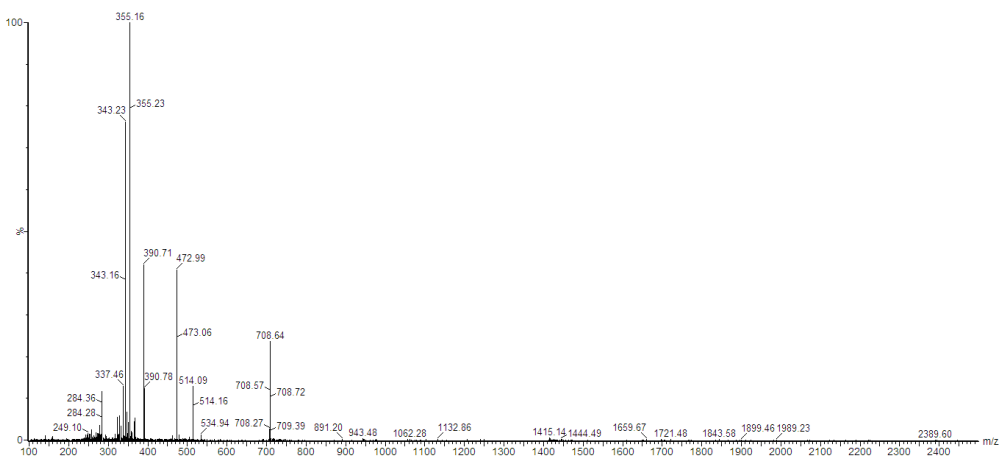

• R<sub>7</sub>

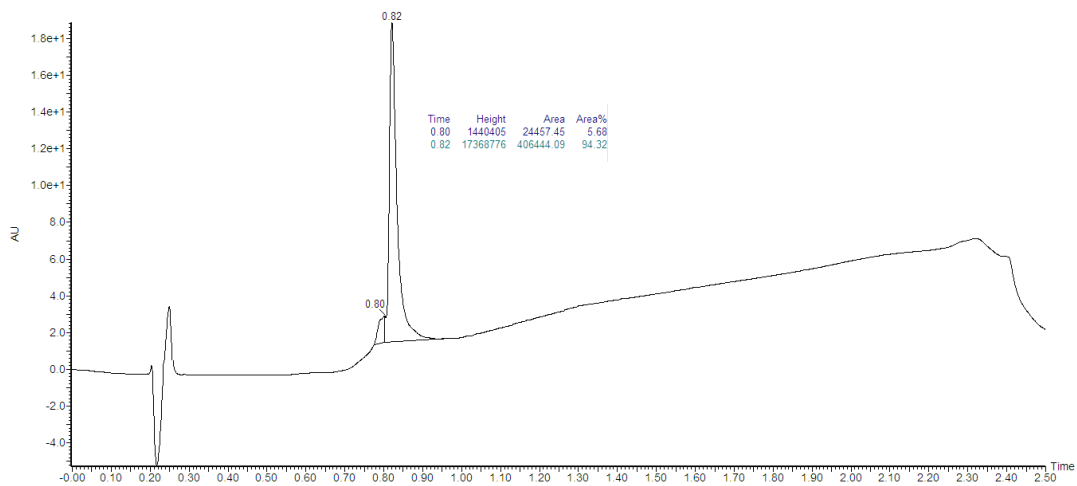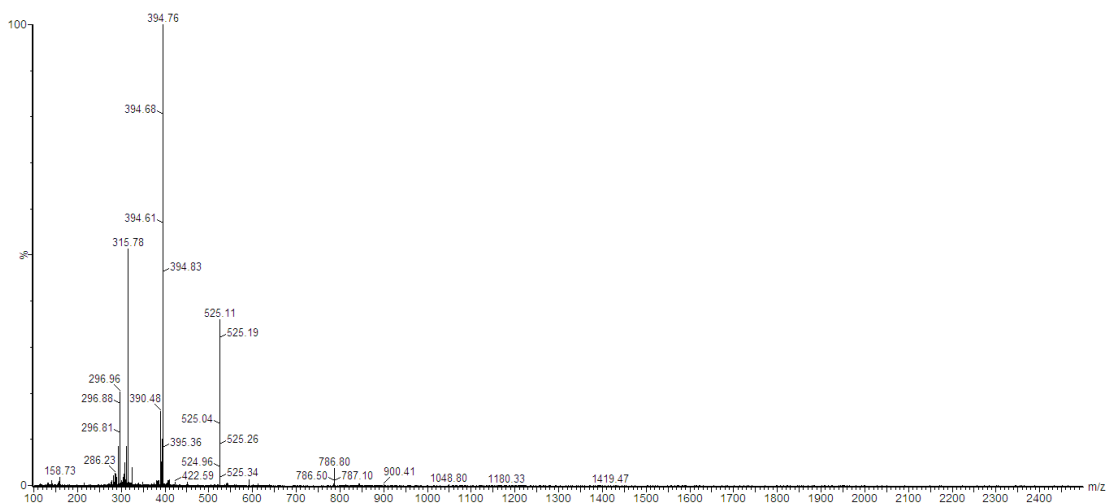

• R<sub>8</sub>

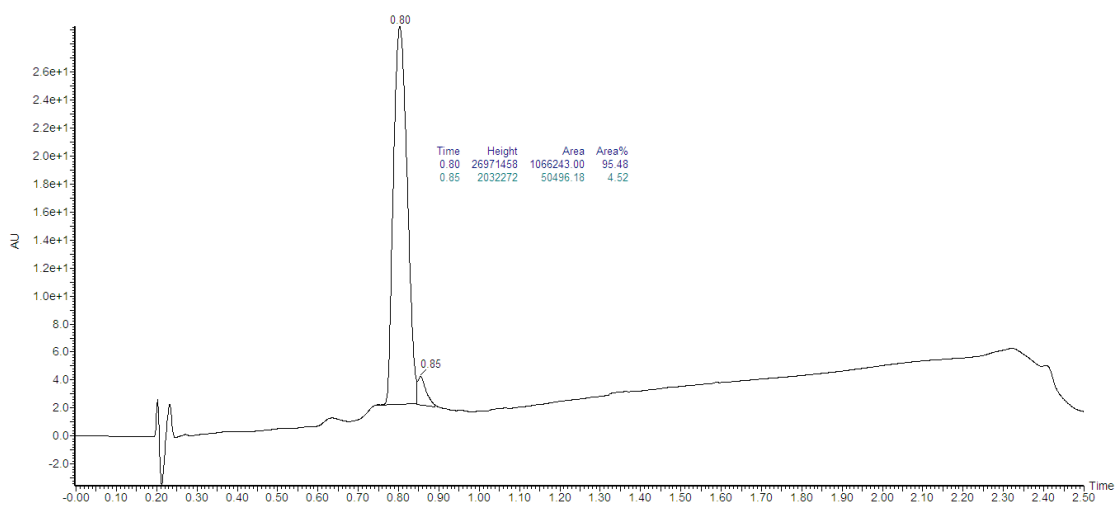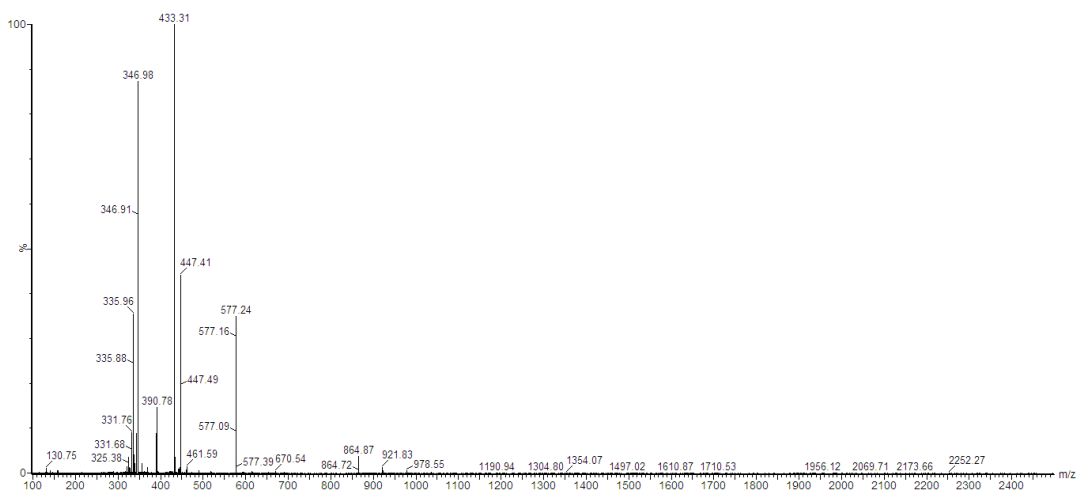

• R<sub>9</sub>

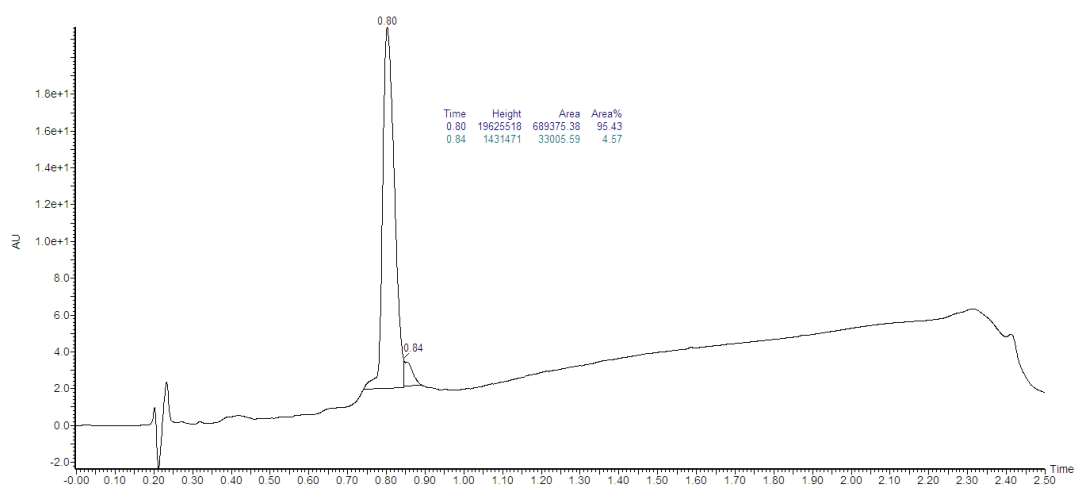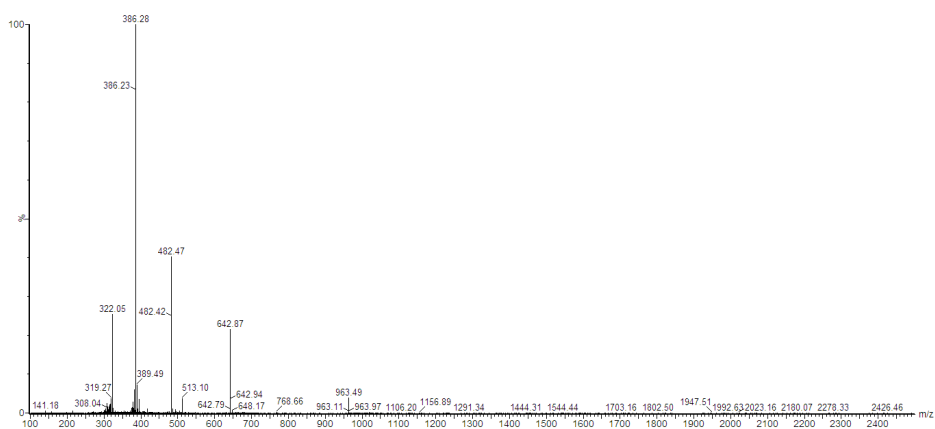

- **Cyc-R<sub>4</sub>**

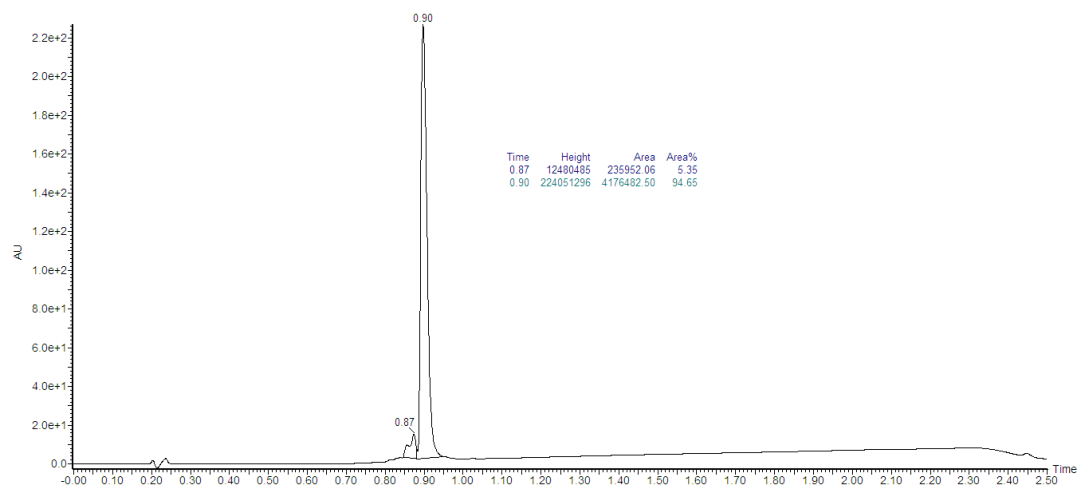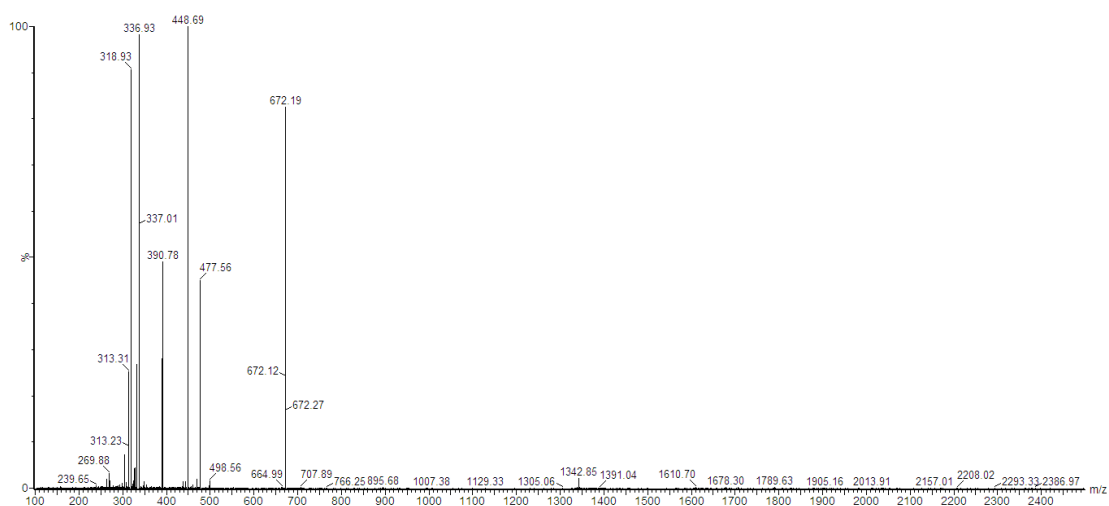

• Cyc-R<sub>6</sub>

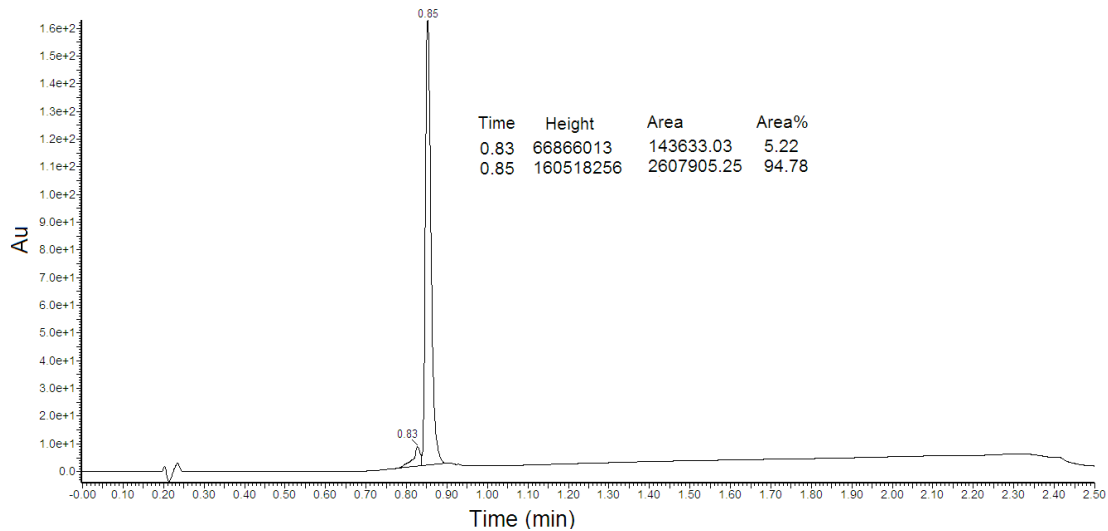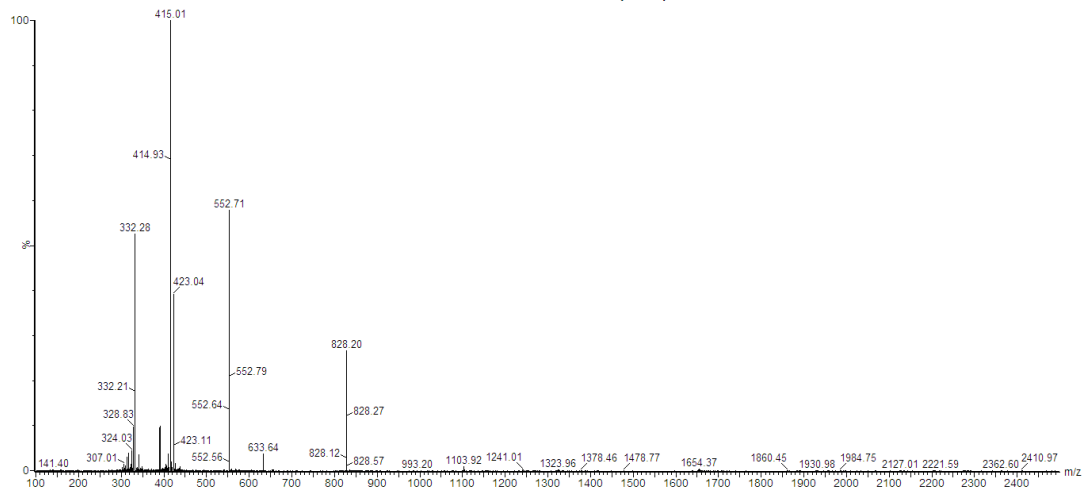



• Cyc-R<sub>7</sub>

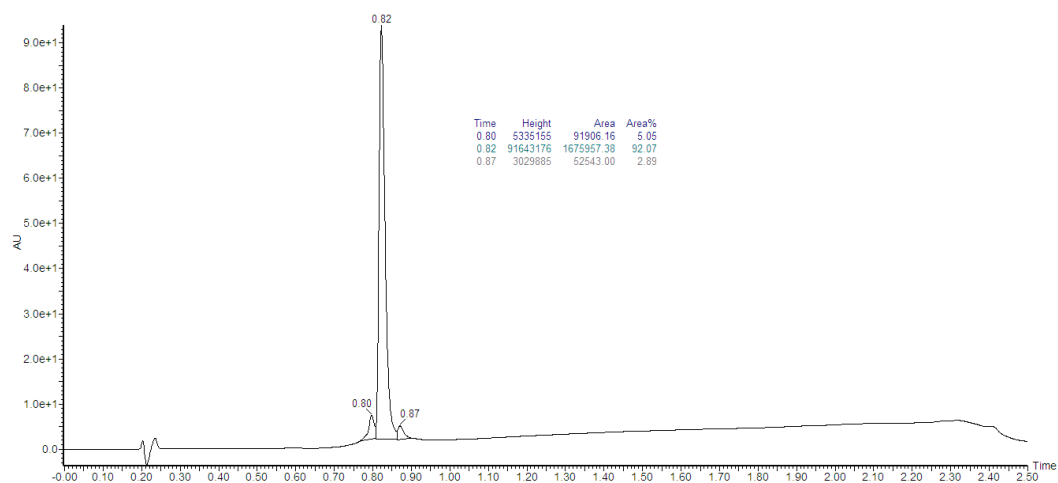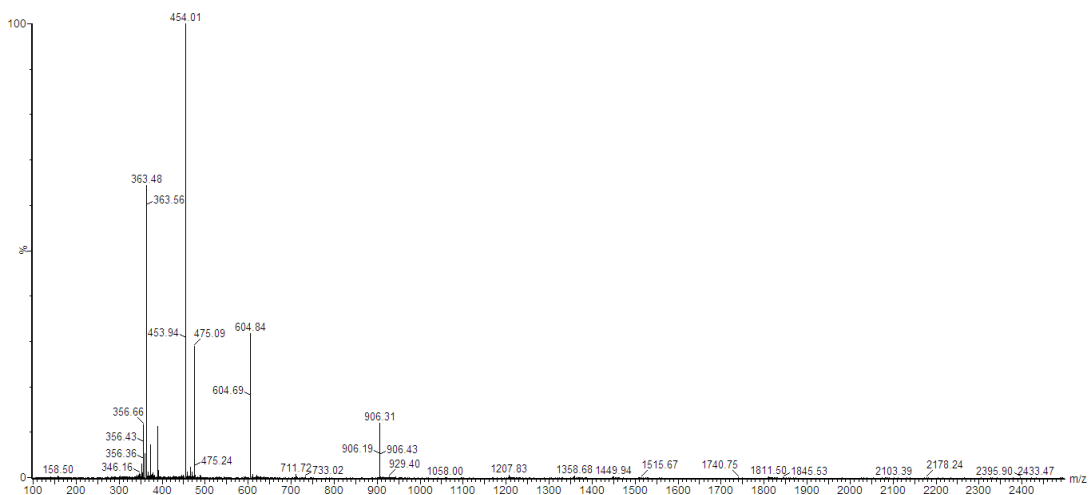

• **Cyc-R<sub>8</sub>**

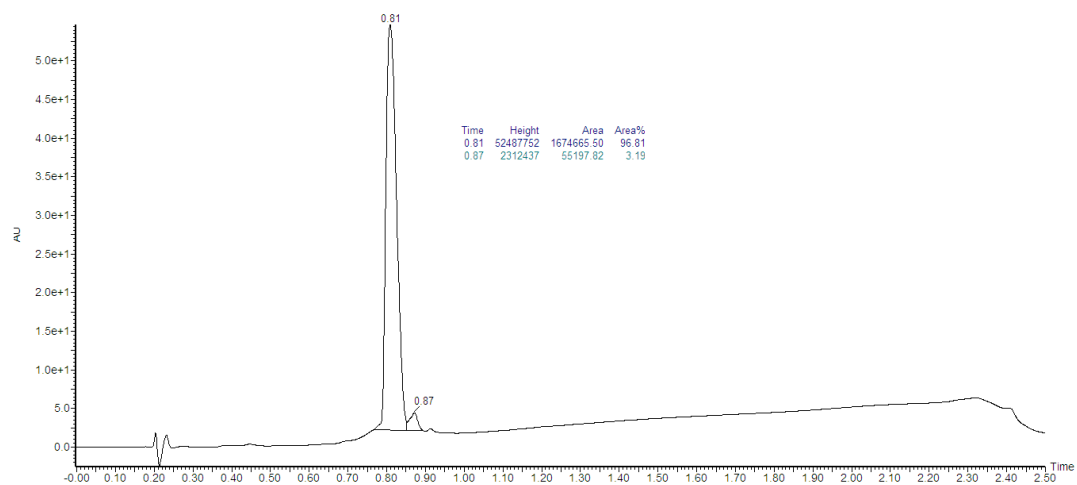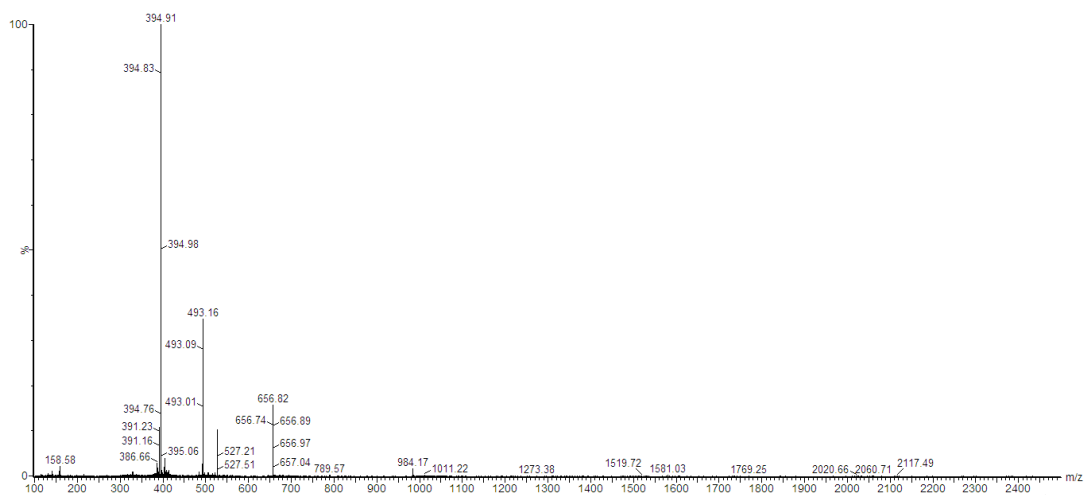

• **Cyc-R<sub>9</sub>**

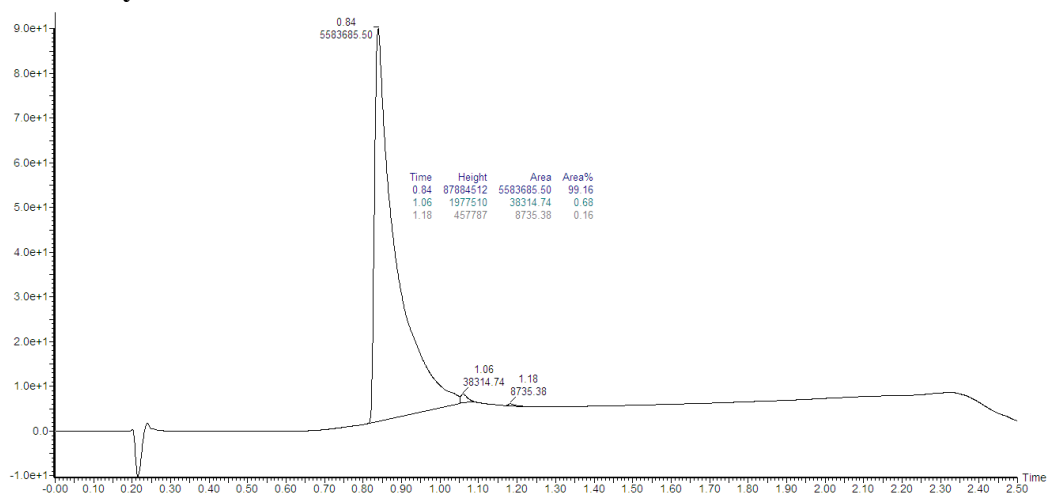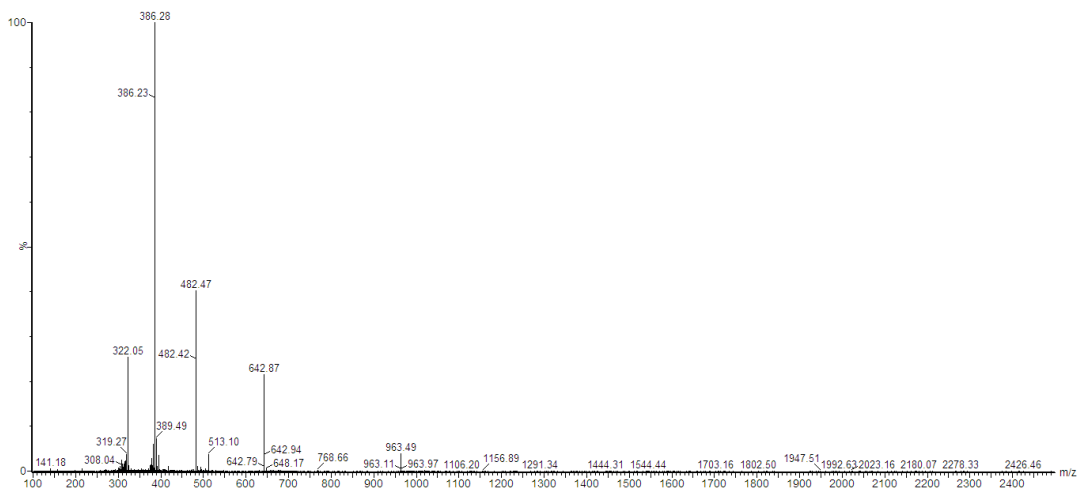

- **Cyc-(L,D)-R<sub>6</sub>**

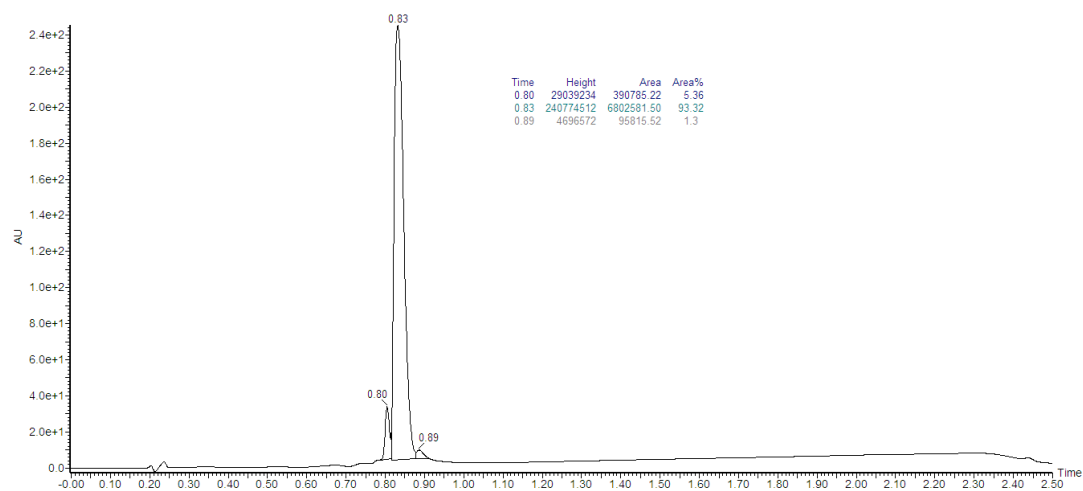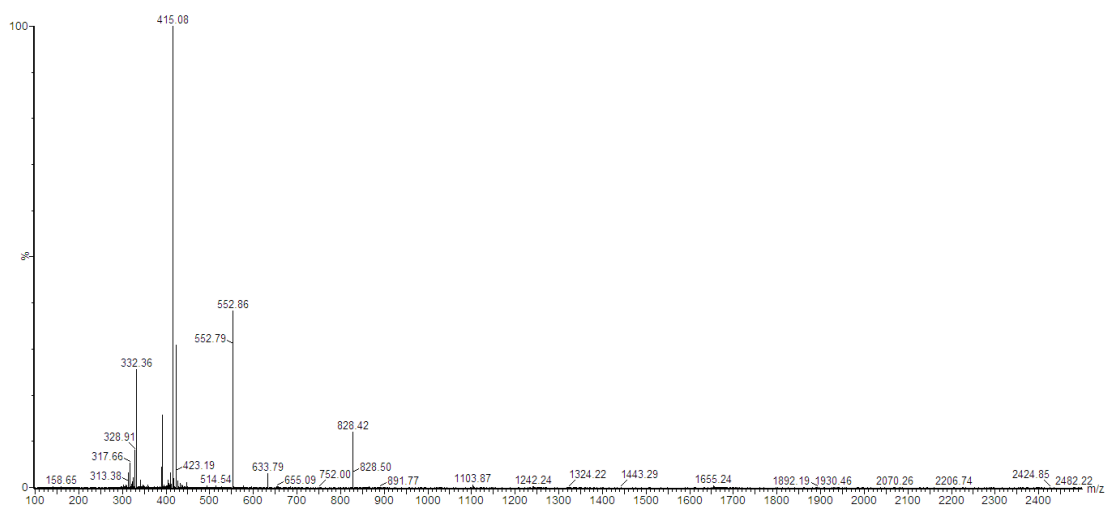

• Cyc-(L,D)-R<sub>7</sub>

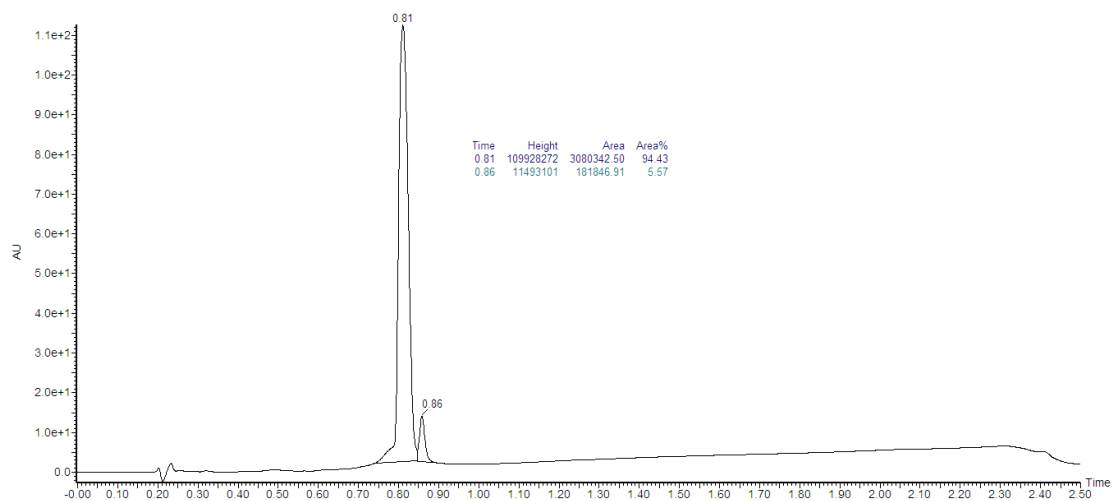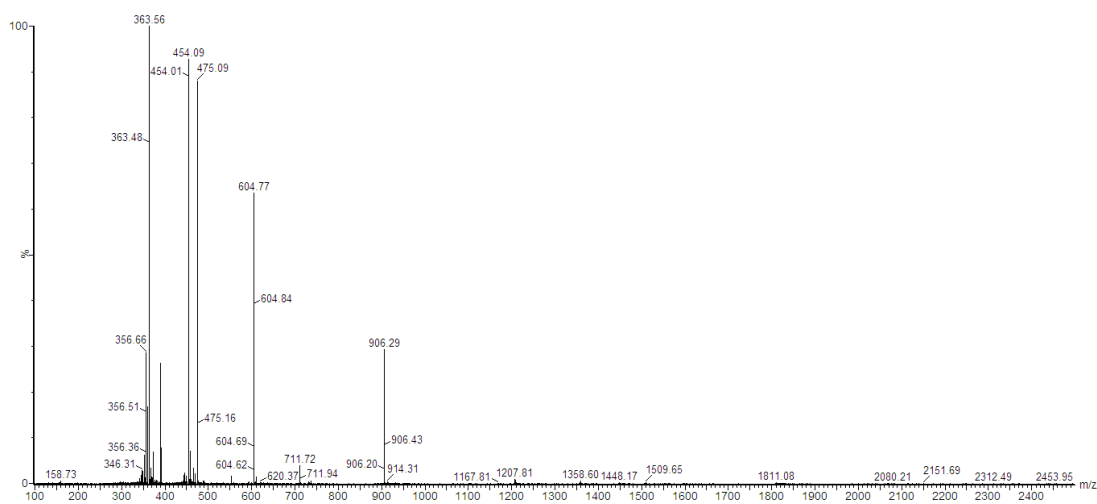

- **Cyc-(L,D)-R<sub>8</sub>**

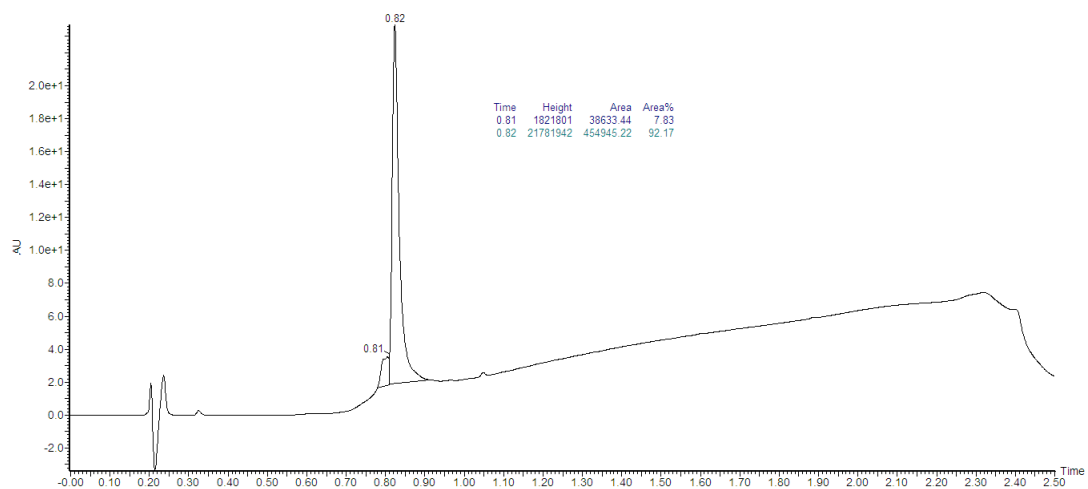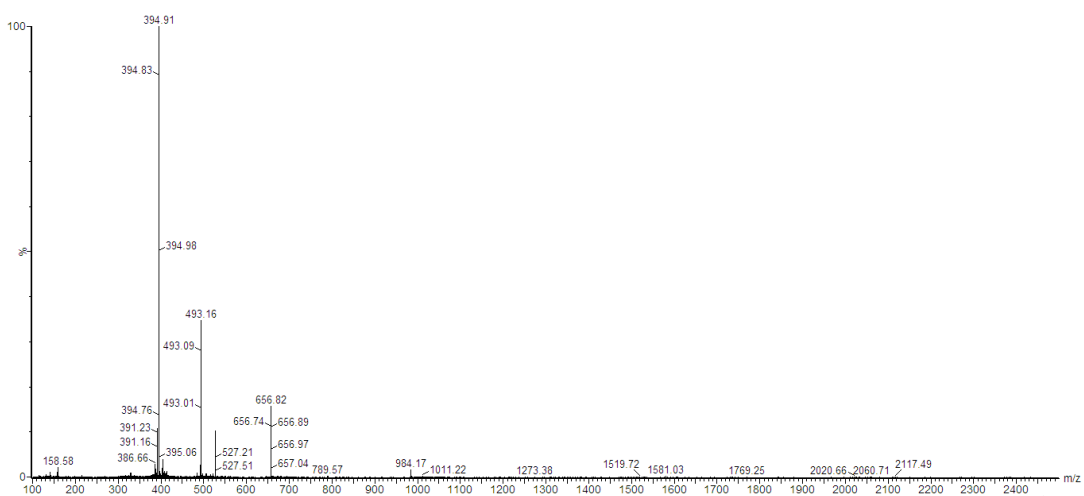

- **Cyc-r<sub>7</sub>**

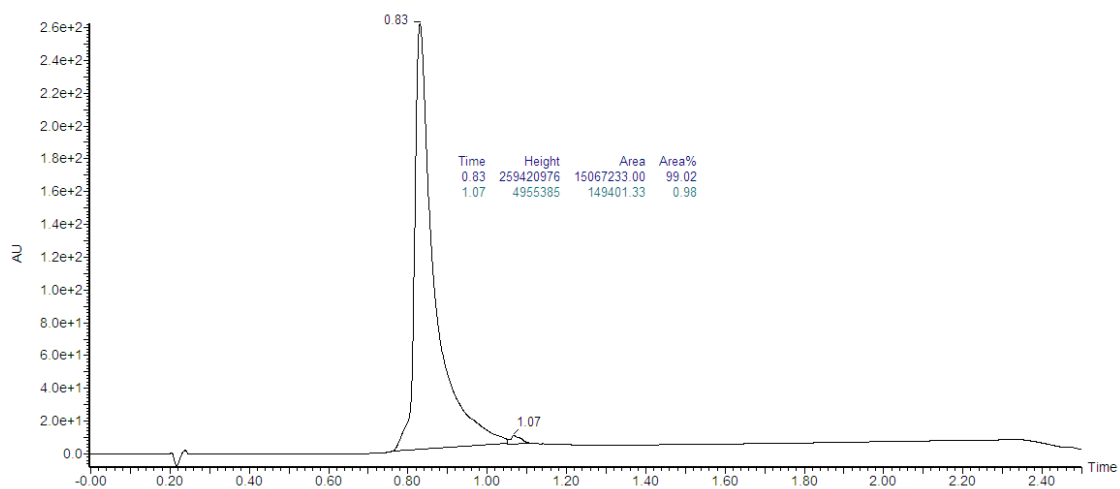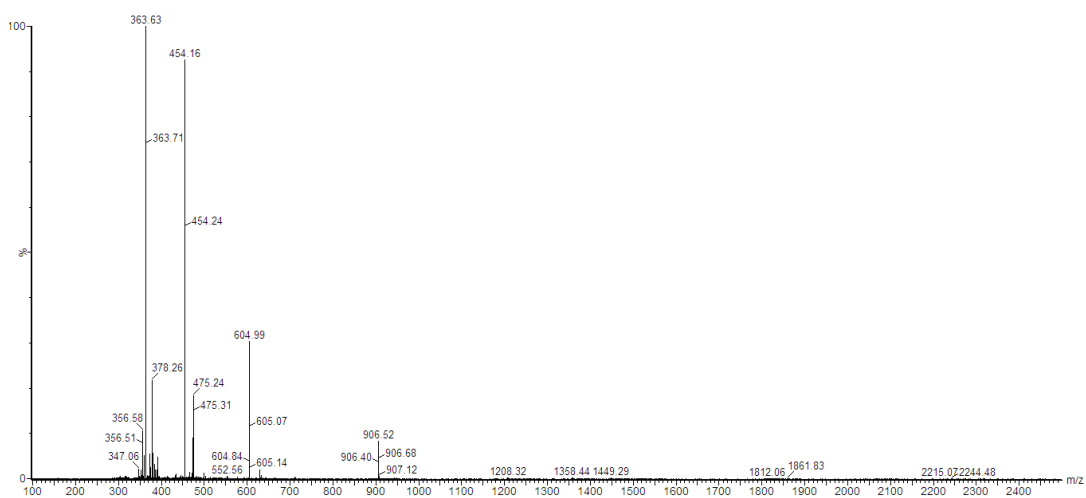

• **Cyc-r<sub>8</sub>**

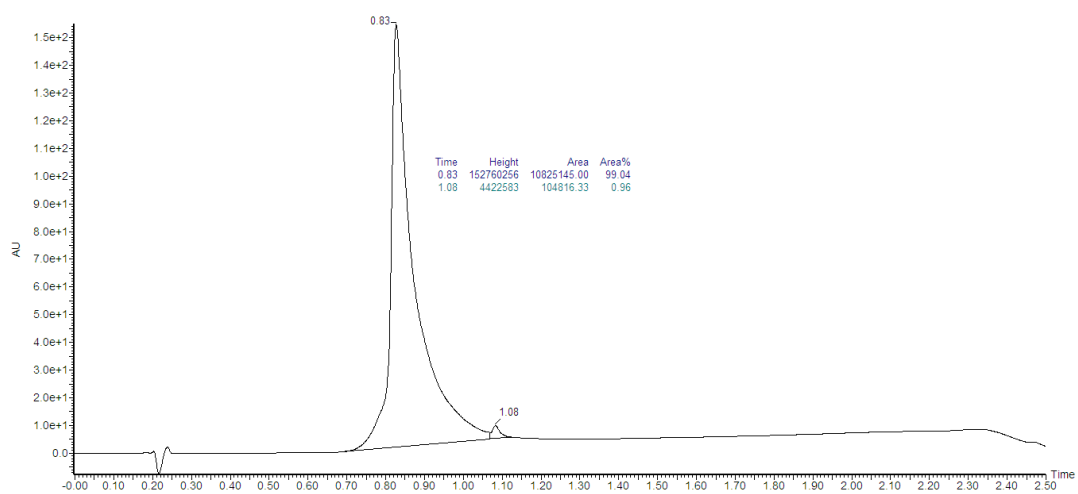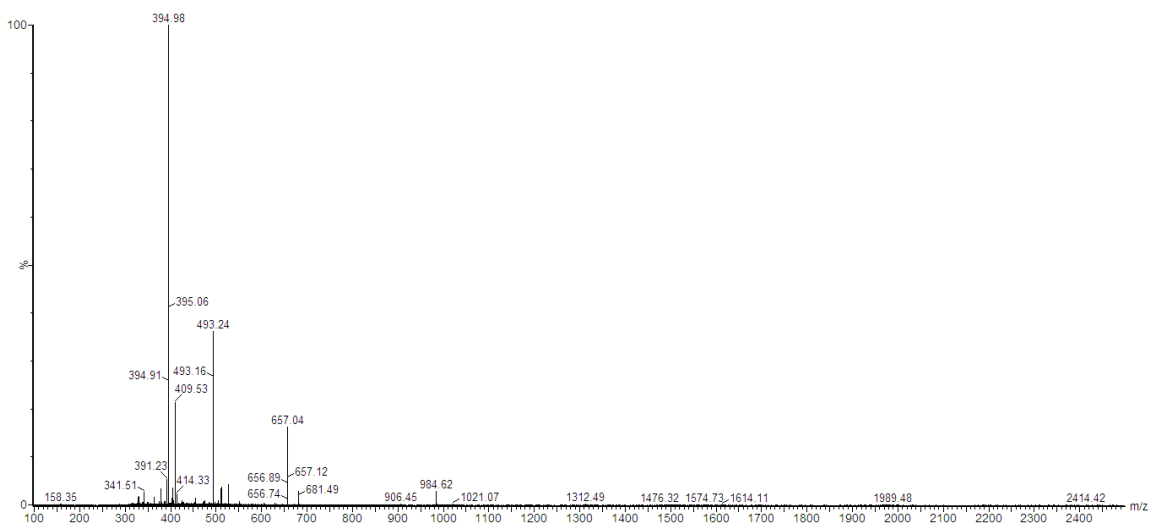



- Cyc-r<sub>9</sub>

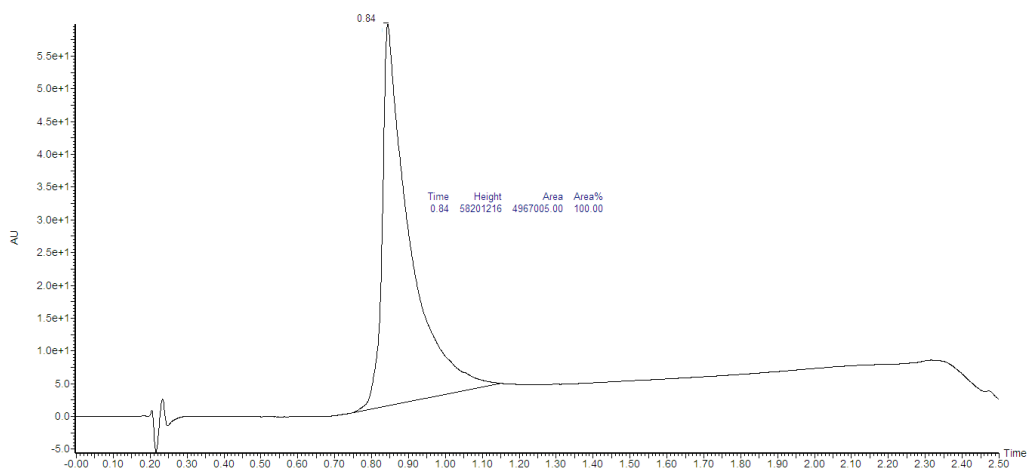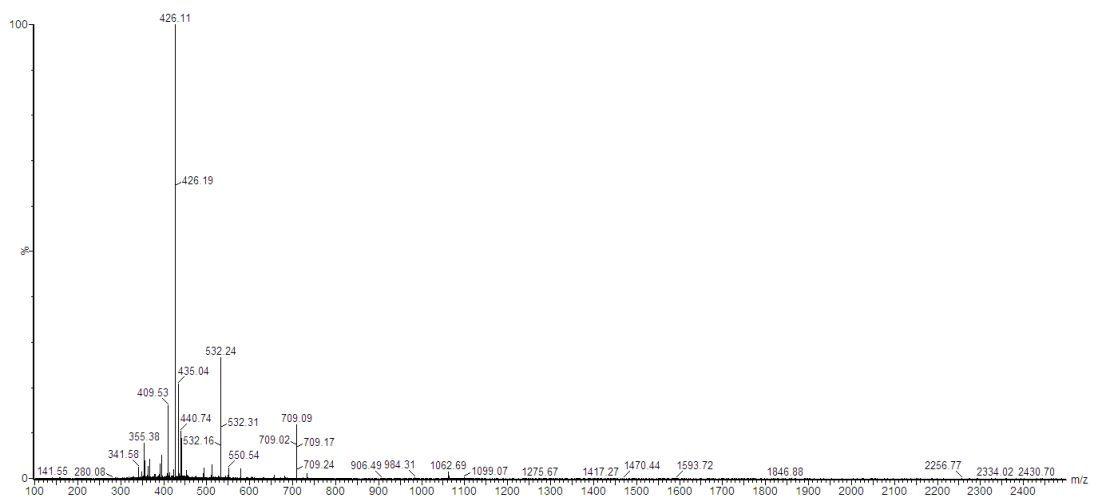

- **Bicyc-0-R<sub>6</sub>**

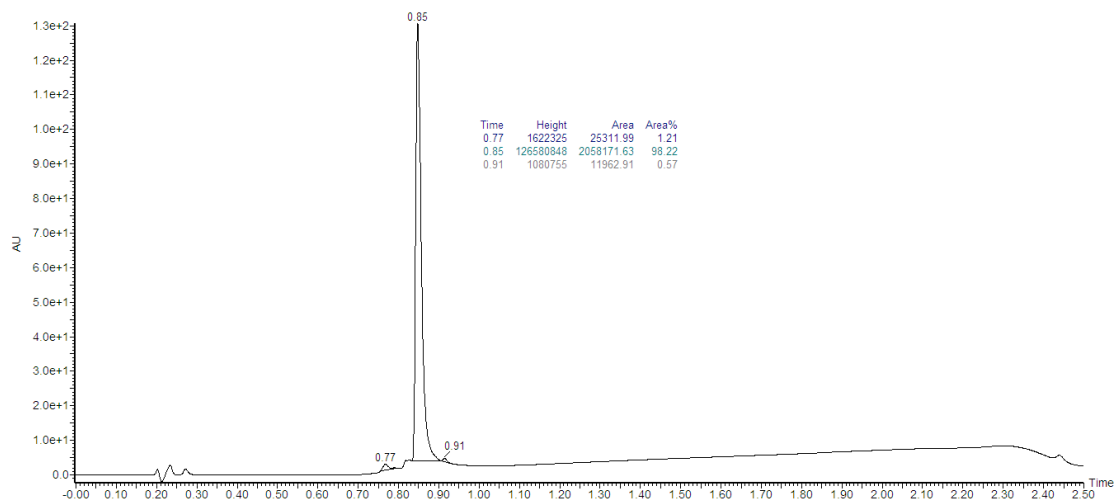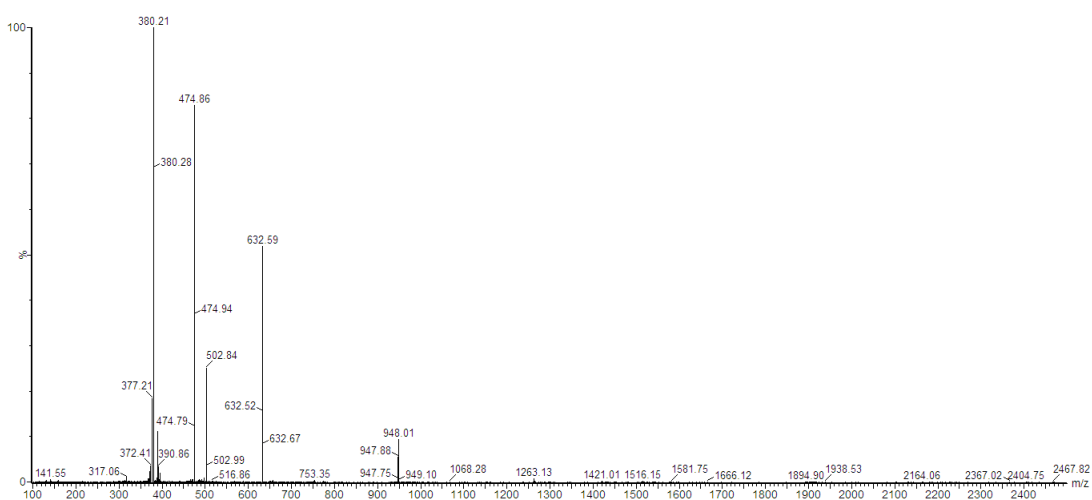

- Bicyc-1-R<sub>6</sub>**

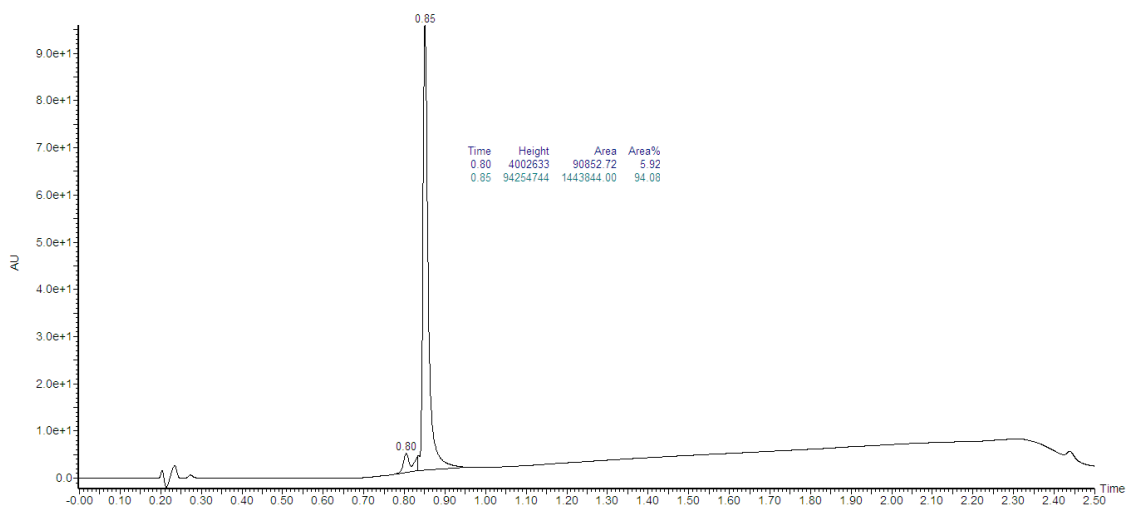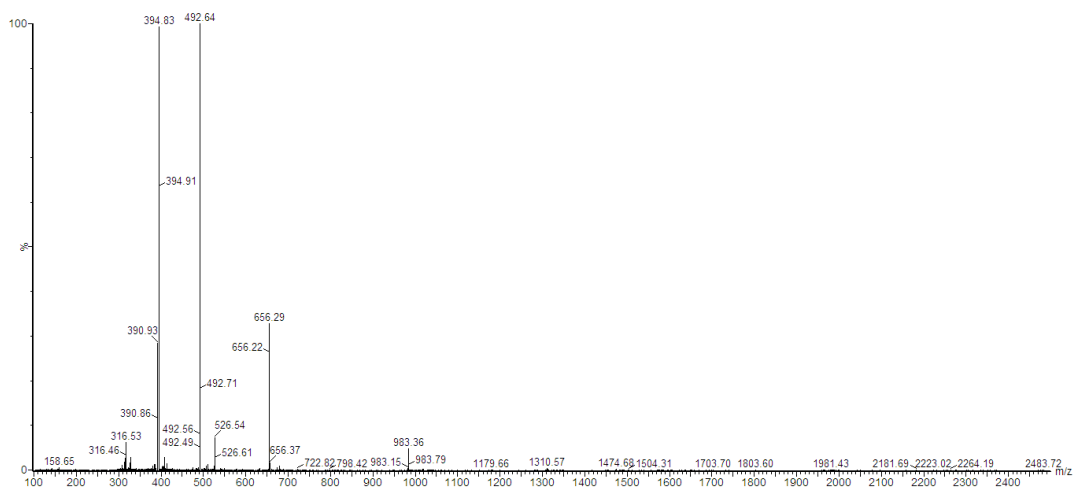

- **Bicyc-2-R<sub>6</sub>**

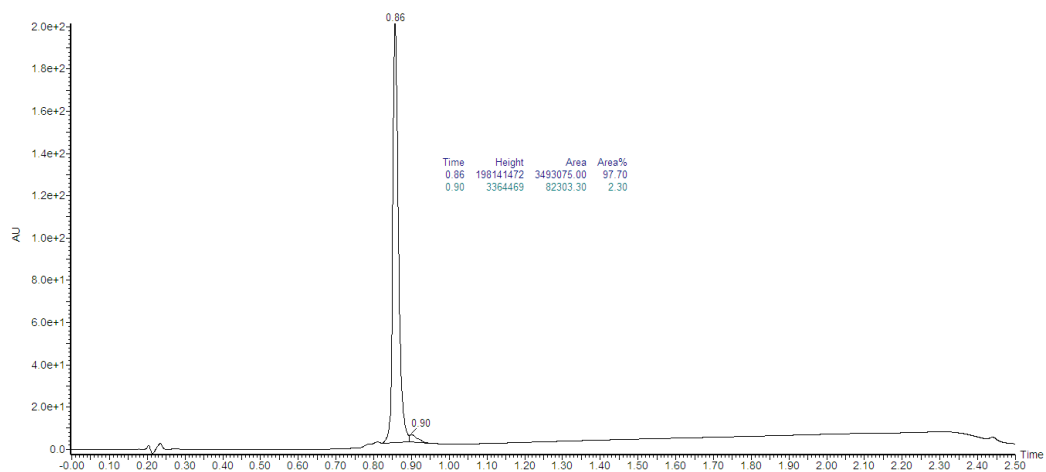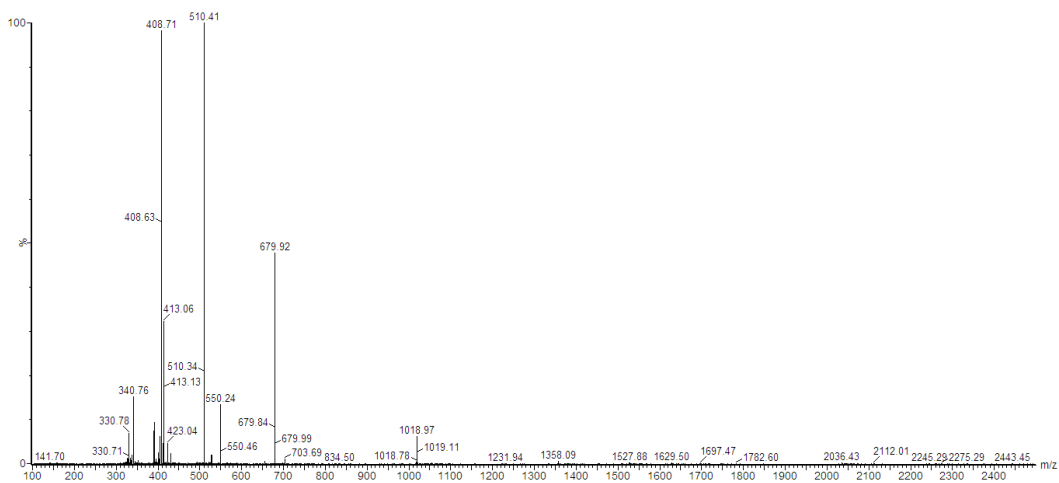

- **Bicyc-3-R<sub>6</sub>**

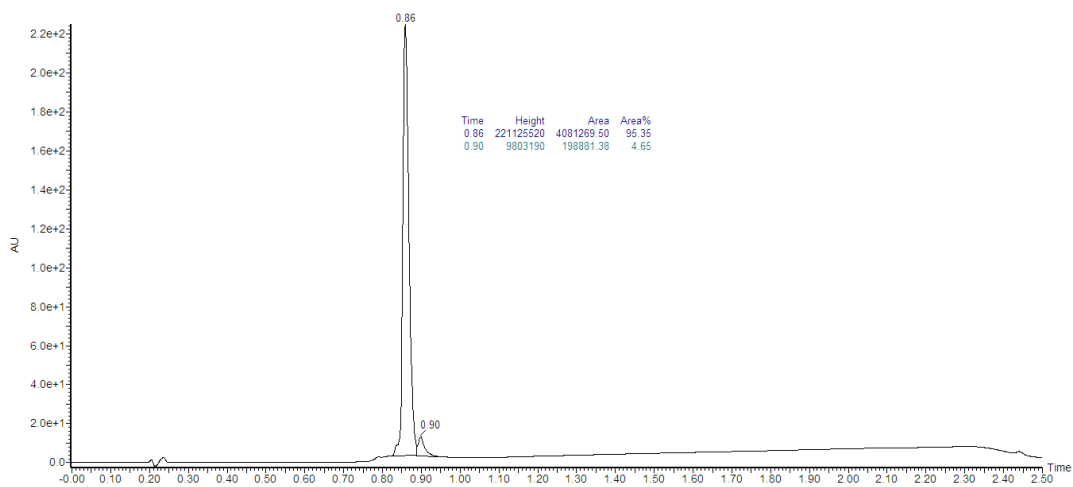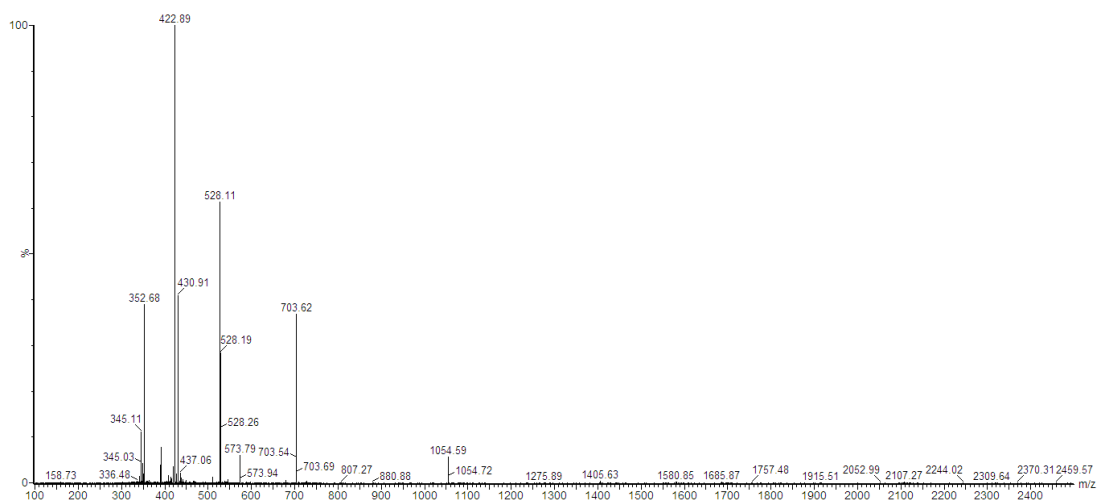

- Cyc-R<sub>3</sub>-R<sub>4</sub>

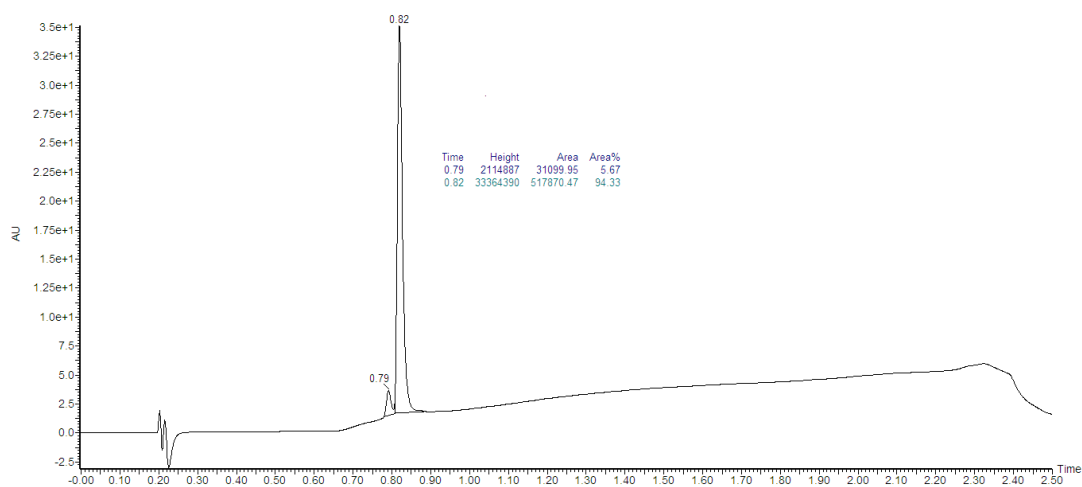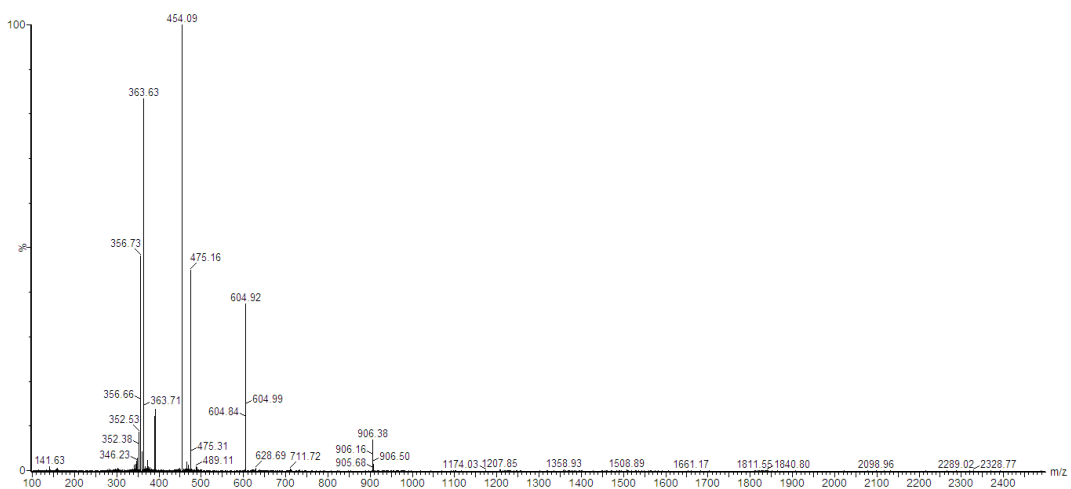

- Cyc-R<sub>4</sub>-R<sub>3</sub>

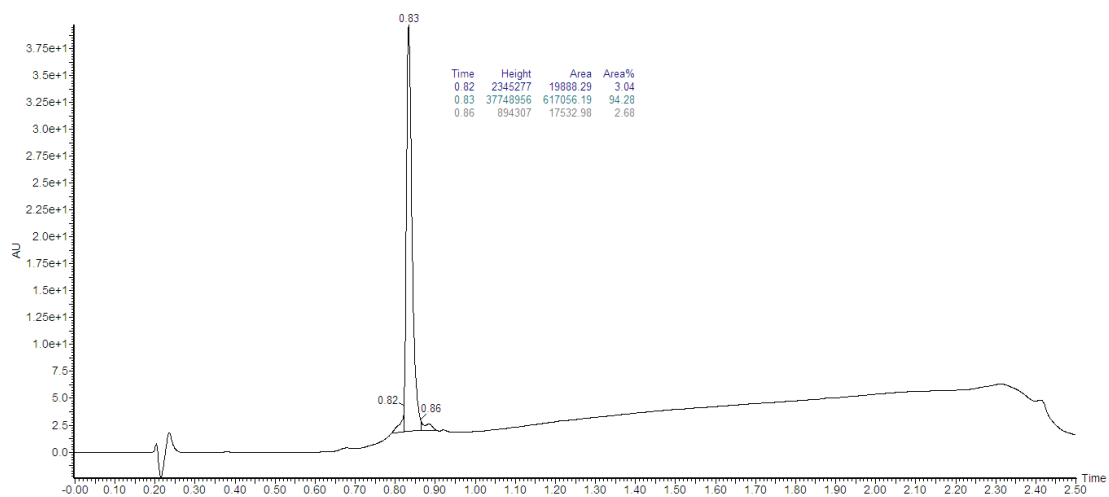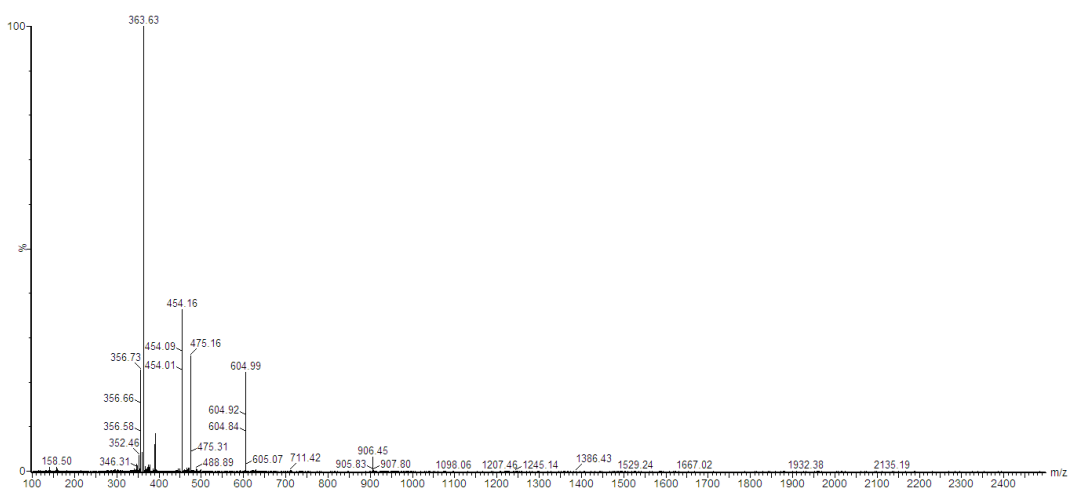

- Cyc-R<sub>5</sub>-R<sub>2</sub>

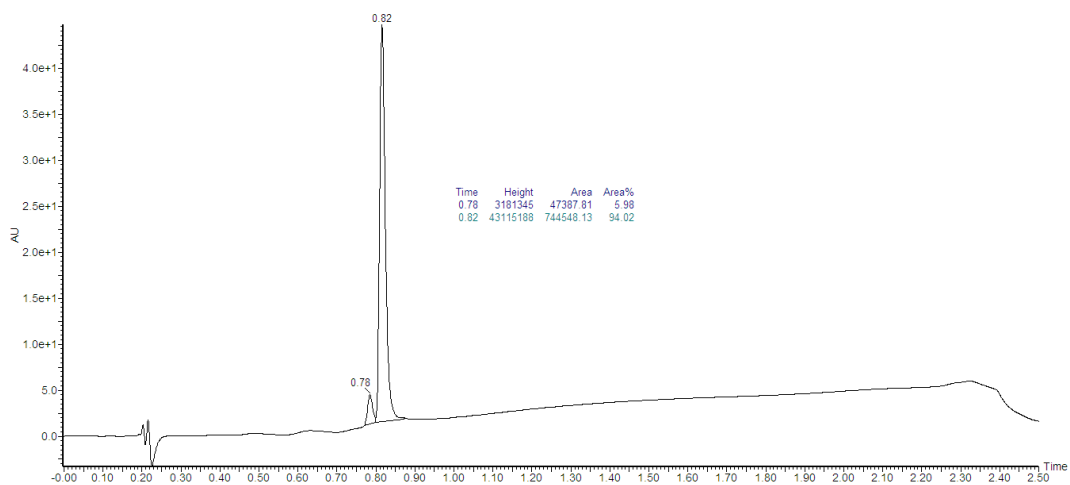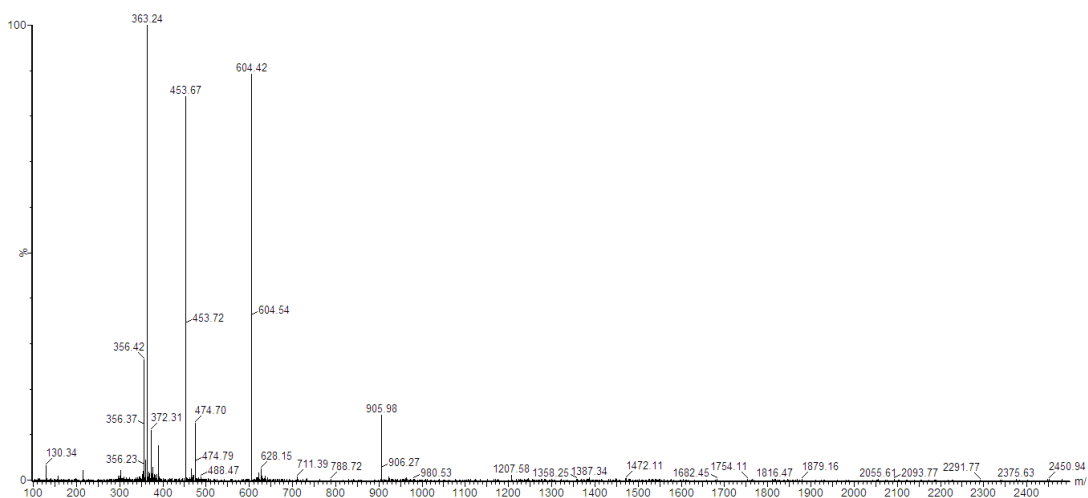



- **Cyc-R<sub>6</sub>-R<sub>1</sub>**

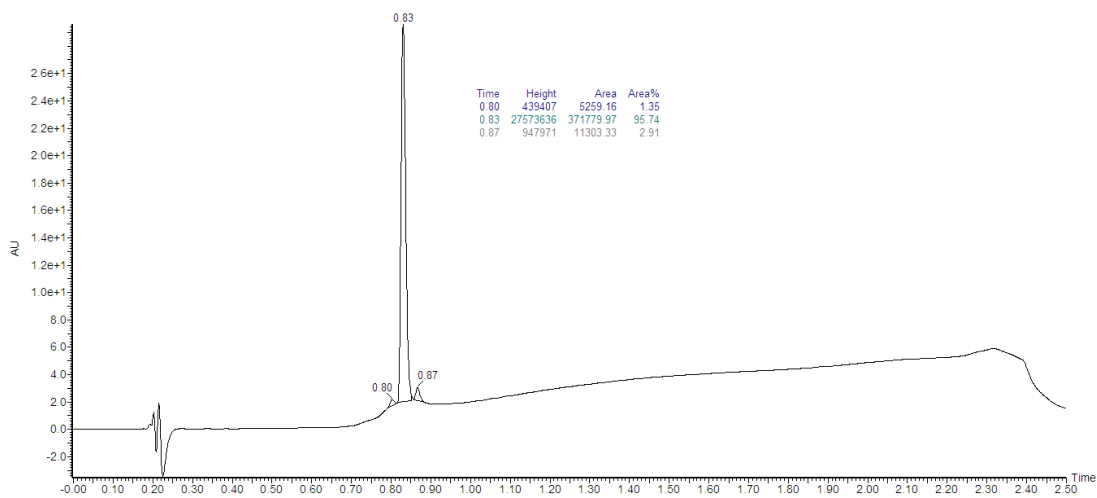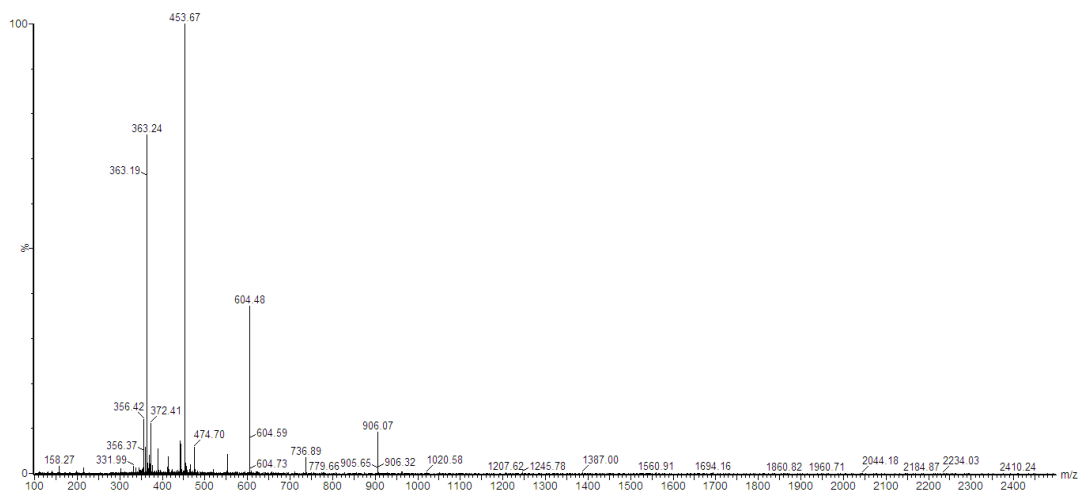

Supplement: Supplementary file 1 [file 3819262]
